# Supplementary material for: Behavioural and neurological symptoms accompanied by cellular neuroinflammation in IL-10-deficient mice infected with Plasmodium chabaudi
Source: PubMed Central journal article supplement (PMC4995805; doi:10.1186/s12936-016-1477-1), 2016-08-24

**A**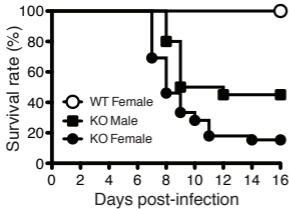**B**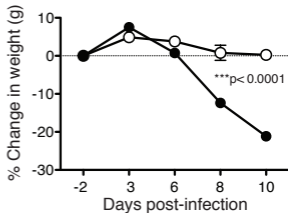**C**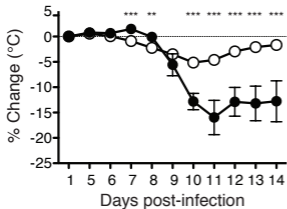**D**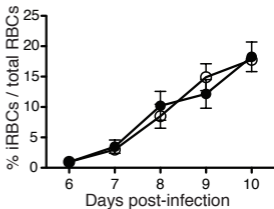

Supplement: 12936_2016_1477_MOESM1_ESM.pdf [file 12936_2016_1477_MOESM1_ESM.pdf]
